# Supplementary material for: Proline Concentration and Its Metabolism Are Regulated in a Leaf Age Dependent Manner But Not by Abscisic Acid in Pea Plants Exposed to Cadmium Stress
Source: MDPI journal article supplement (doi:10.3390/cells10040946), 2021-04-20
Supplement: s1 [file s1]

**Proline concentration and its metabolism are regulated in a leaf age dependent manner but not by abscisic acid in pea plants exposed to cadmium stress**

Edyta Zdunek-Zastocka\*, Agnieszka Grabowska, Beata Michniewska, Sławomir Orzechowski

Department of Biochemistry and Microbiology, Warsaw University of Life Sciences – SGGW, Nowoursynowska 159, 02-776 Warsaw, Poland

\*The corresponding author: e-mail address: edyta\_zdunek\_zastocka@sggw.pl, tel.: +48 22 593 2577; fax: +48 22593 2562.

**Table S1.** Oligonucleotide sequences of *Medicago truncatula* used as primers for amplification of internal fragments of the *Pisum sativum* genes. F, forward primer; R, reverse primer.

| <i>Pisum sativum</i> gene | Accession number of the <i>Medicago truncatula</i> sequence in GenBank database | Oligonucleotide sequence (5'→3')                                  |
|---------------------------|---------------------------------------------------------------------------------|-------------------------------------------------------------------|
| <i>PsP5CS1</i>            | AJ278818                                                                        | F: CGCCCTGATGCATTGGTACAGATAGC<br>R: CATTGTGAAAAACAGCAGCACTATC     |
| <i>PsP5CS2</i>            | JN809240                                                                        | F: ATGACTGCTAAGGTTAATGCTGCTG<br>R: GATCTTTGTGAACAAGAAGGGTTTCC     |
| <i>PsPDH1</i>             | XM_013595747                                                                    | F: CATGCCAATATTGGTTGATGCTGAACACAC<br>R: GTGCATCTGACATTCCACATAGTTG |
| <i>PsProT1</i>            | XM_003600790                                                                    | F: GACACATTAGATACAGAGATCTTGCTG<br>R: GCAATGACTGATTGAAGGAAGGCTG    |
| <i>PsProT2</i>            | XM_013602264                                                                    | F: CTATTGTTGGATATTGGGCTTATGG<br>R: CGAAGAGCTGAAATTGTGGTTGC        |

**Table S2.** Primer sequences used for real-time PCR analysis. F, forward oligonucleotide; R, reverse oligonucleotide.

| Gene             | Accession number of the <i>Pisum sativum</i> sequence in GenBank database | Oligonucleotide sequence (5'->3')                             |
|------------------|---------------------------------------------------------------------------|---------------------------------------------------------------|
| <i>PsP5CS1</i>   | MW030636                                                                  | F: CGAAGTGGGAATGGGCTTCTCTTG<br>R: CAACTTAAGTAGCTCGGGTATTTCTGC |
| <i>PsP5CS2</i>   | MW423825                                                                  | F: CCATGCCAGATACAGTCGGTAGC<br>R: CAAGAACAGGGATTCTTGTTGACTC    |
| <i>PsPDH1</i>    | MW183670                                                                  | F: TTGGGGTTGGGAAAGTGAATCAC<br>R: GTGCATCTGACATTCCACATAGTTG    |
| <i>PsProT1</i>   | MW030634                                                                  | F: AGCAGCCAGTTGTCAAGAACATGATG<br>R: GCAATGACTGATTGAAGGAAGGCTG |
| <i>PsProT2</i>   | MW030635                                                                  | F: GGAAAGACAGCTAGAACAGAGAAG<br>R: CGAAGAGCTGAAATTGTGGTTGC     |
| <i>GAPDH</i>     | X73150                                                                    | F: GTGGTCTCCACTGACTTTATTGGT<br>R: TTCCTGCCTTGGCATCAAA         |
| <i>β-Tubulin</i> | X54844                                                                    | F: GCTCCCAGCAGTACAGGACTCT<br>R: TGGCATCCCACATTTGTTGA          |
| <i>Actin</i>     | X90378                                                                    | F: ATCATGGAGCCTGAGAGTTG<br>R: CACATACCACTAGGCCAATC            |

|         |                                                                                                                          |      |
|---------|--------------------------------------------------------------------------------------------------------------------------|------|
| P5P5CS1 | -----gacctg                                                                                                              | 6    |
| MsP5CS1 | ttttggagaaaacgtcatctcctttgggagttcttttaattattttcgagtcctgcctg                                                              | 1414 |
| MtP5CS1 | ttttggagaaaacgtcatctcctttgggagtccttttaattattttcgagtcctgcctg                                                              | 1319 |
| BnP5CS1 | ttttggagaagacctcatccccattaggcgtagctctgattgttttgagtcctgcacctg                                                             | 1342 |
| AtP5CS1 | tcttagagaagacctcatcaccattaggcgtagctctgattgttttgaatcccgacctg<br>* ****                                                    | 1629 |
| P5P5CS1 | atgctcttgttcagatagcttccttggcaatacgaagtgggaatgggcttctcttgaaag                                                             | 66   |
| MsP5CS1 | atgcattggtacagatagcttccttggcaatacgaagtgggaatgggcttctcttgaaag                                                             | 1474 |
| MtP5CS1 | atgcattggtacagatagcttccttggcaatacgaagtgggaatgggcttctcttgaaag                                                             | 1379 |
| BnP5CS1 | atgcattgtacagatagcttcacttgctatccggagtggaaatggcttcttattgaagg                                                              | 1402 |
| AtP5CS1 | atgcattgtacagatagcttcacttgccatccgtagtggaaatggcttctctgctgaagg<br>**** * ** ***** * ** * * * ***** ***** ***** * *         | 1689 |
| P5P5CS1 | gaggcaaggaggctaagagatcaaatgcaattttgcacaaagtaattactgaagctatac                                                             | 126  |
| MsP5CS1 | gaggcaaggaggctaatacgatcaaatgccattttgcacaaagtaattactgaagccatac                                                            | 1534 |
| MtP5CS1 | gaggcaaggaggctaatacgatcaaatgccattttgcacaaagtaattactgaagccatac                                                            | 1439 |
| BnP5CS1 | gtggaaaggaggccaggagatcaaatgctatcttacacaaggtgataactgatgctattc                                                             | 1462 |
| AtP5CS1 | gtggaaaggaggccggcgatcaaatgctatcttacacaaggtgatcactgatgcaattc<br>* ** ***** ***** * * * * * * * * * * * * * *              | 1749 |
| P5P5CS1 | cagatactgttggttcaaaacttattggacttgtagacatcaagagcagaaatacccgagc                                                            | 186  |
| MsP5CS1 | ctgatactgttggttcaaaacttattggacttgtagacatcaagagctgaaatacctgagc                                                            | 1594 |
| MtP5CS1 | ctgatactgttggttcaaaacttattggacttgtagcgtcaagagctgaaatacctgagc                                                             | 1499 |
| BnP5CS1 | cagagactgttggttggttaaactcattggacttgtagcttcaagggaagagattcctgatt                                                           | 1522 |
| AtP5CS1 | cagagactgttggttggttaaactcattggacttgtagcttcaagagaagagattcctgatt<br>* ** ***** ***** ***** * * * * * * * * *               | 1809 |
| P5P5CS1 | tacttaagttggatgatgtaattgatctggtgattccaagaggcagcaacaaacttggtt                                                             | 246  |
| MsP5CS1 | tacttaagctggatgatgtaattgatctggtgattccaagaggcagcaataaacttggtt                                                             | 1654 |
| MtP5CS1 | tacttaagctggatgatgtaattgatctggtgattccaagaggcagcaataaacttggtt                                                             | 1559 |
| BnP5CS1 | tgtcaagcttgatgacgttattgatcttggtgatccaagaggcagcaacaagcttggtt                                                              | 1582 |
| AtP5CS1 | tgtctaaagcttgatgacgttatcgatcttggtgatccaagagggaagcaacaagcttggtt<br>* ** * * * * * * * * * * * * * * * * * * * * * * * * * | 1869 |
| P5P5CS1 | ctgatatacaaaagttccacgaaaatccctgttctgggtcatgctgatggaatttgctacg                                                            | 306  |
| MsP5CS1 | ctgatattaagagttcgacgaaaatccctgttctaggtcatgctgatgggatttgctacg                                                             | 1714 |
| MtP5CS1 | ctgatattaagagttcgacgaaaatccctgttctaggtcatgctgatggaatttgctacg                                                             | 1619 |
| BnP5CS1 | cccagattaaaaaactacaaaaatccctgttcttggtcatgctgatggaatctgtcatg                                                              | 1642 |
| AtP5CS1 | ctcagataaaaaatactacaaaaatccctgtgctaggtcatgctgatggaatctgtcatg<br>* * * * * * * * * * * * * * * * * * * * * * * * *        | 1929 |
| P5P5CS1 | tctatgttgataaatctgcaaatctggagatggctaagcagattgtactcgatgcaaaaa                                                             | 366  |
| MsP5CS1 | tctatgttgataaatctgctaatttgagatggctaagcagattgtactcgatgcaaaaa                                                              | 1774 |
| MtP5CS1 | tctatgttgataaatctgctaatttgagatggctaagcagattgtactcgatgcaaaaa                                                              | 1679 |
| BnP5CS1 | tatatgtggacaaggcttgtaattgtggatatggctaaacgcatagtttctgatgcaaaag                                                            | 1702 |
| AtP5CS1 | tatatgtcgacaaggcttggtgatacgatgtaagcagcagcagcagcagcagcagcagc<br>* ***** * * * * * * * * * * * * * * * * * * * * * * *     | 1989 |
| P5P5CS1 | cagattatccagcaggtgcaatgccatggaaacacttcttgttcataaggatttggttag                                                             | 426  |
| MsP5CS1 | cagattgtccatcaggatgcaatgccatggaaacacttcttgttcataaggatttggttag                                                            | 1834 |
| MtP5CS1 | cagattatccatcaggatgcaatgccatggaaacacttcttgttcataaggatttggttag                                                            | 1739 |
| BnP5CS1 | tagactatccagcagcttgtaattgccatggaaacacttcttgttgataaggatctggagc                                                            | 1762 |
| AtP5CS1 | tgactatccagcagctgtaattgcatggaaccccttcttgttgataaggatctagagc<br>* * * * * * * * * * * * * * * * * * * * * * * *            | 2049 |
| P5P5CS1 | agaaaggctggataaataatattatcgctgacttgccgacagaaggcggttacgatatatg                                                            | 486  |
| MsP5CS1 | agaaaggctggctcaatagtagtgacgatttgccggtcggaagggtgttactttatatg                                                              | 1894 |
| MtP5CS1 | agaaaggctggctcaatagtagtgcaatttgccggtcagaagggtgttactttatatg                                                               | 1799 |
| BnP5CS1 | agaacgctgtgctcaatgagcttatatttgctctgcagagcaatggagtcactttgtatg                                                             | 1822 |
| AtP5CS1 | agaatgctgtgcttaatgagcttatatttgctctgcagagcaatggagtcactttgtatg<br>**** * * * * * * * * * * * * * * * * * * * * * * *       | 2109 |
| P5P5CS1 | gaggacccaaagcaagttctctatttagctattccacttgctcgttcactacatcacgagt                                                            | 546  |
| MsP5CS1 | gaggaccgaaagcaagttctctgttgatgttccacttgctcgttcattacatcatgagt                                                              | 1954 |
| MtP5CS1 | gaggaccgaaagcaagttctctgttgatgttccacttgctcgttcattacatcacgagt                                                              | 1859 |
| BnP5CS1 | gtggaccaaaggcaagtaaaatacttaacctaccagaagcacggtcggttcaatcacgagt                                                            | 1882 |
| AtP5CS1 | gtggaccgaaggcaagtaagatactgaacataccagaagcacggtcattcaaccatgagt<br>* ***** * ***** * * * * * * * * * * * * * * *            | 2169 |

|         |                                                                 |      |
|---------|-----------------------------------------------------------------|------|
| PsP5CS1 | attgttcggttgcttgcaactggtgaaatcggtgatgatgtttatgcagctatcggtcata   | 606  |
| MsP5CS1 | actgttcggttgcttgcaactggtgaaatcggtgatgatgtttatgcagctattcatcata   | 2014 |
| MtP5CS1 | actgttcggttgcttgcaactggtgaaatcggtgatgatgtttatgcagctattgatcata   | 1919 |
| BnP5CS1 | actgttccaaggcgtgcactggtgaagtgttagaagatgtttatggtgctgtagatcaca    | 1942 |
| AtP5CS1 | actgtgccaaggcgtgcactggtgaagtgttagaagacgtttatggtgctatagatcaca    | 2229 |
|         | * * * * *                                                       |      |
| PsP5CS1 | taaatctttatggaagtgcacatactgattccattatcacggaagatcatgaagtagctg    | 666  |
| MsP5CS1 | taaatctttatggaagtgcacataccgattccattgtcacagaagatcatgaagtagctg    | 2074 |
| MtP5CS1 | taaatcgttatggaagtgcacataccgattccattgtcacagaagatcatgaagtagcta    | 1979 |
| BnP5CS1 | ttcacgacatggaagtgcacacacagactgtattgtgacagaggatcccgaagttgcag     | 2002 |
| AtP5CS1 | ttcacgacatgggagtgcacacacagactgcattgtgacagaggatcacgaagttgcag     | 2289 |
|         | * * *                                                           |      |
| PsP5CS1 | atgtattttcttcgtcaagtcgacagtgtgctgccgtattttcacaatg-----          | 711  |
| MsP5CS1 | atgtattttcttcgtcaagtcgacagtgtgctgctgtttttcacaatgctagtacaagattca | 2134 |
| MtP5CS1 | atgtattttcttcgtcaagtcgacagtgtgctgctgtttttcacaatgctagtacaagattca | 2039 |
| BnP5CS1 | agctatttcttcgccaagtggacagcgtgctgtgtgttccacaacgcaagcacaagattct   | 2062 |
| AtP5CS1 | agctatttcttcgccaagtggatagcgtgctgtgtgttccacaacgccagcacaagattct   | 2349 |
|         | * * * * *                                                       |      |

**Figure S1.** The alignment of the nucleotide sequence fragment of *Pisum sativum* PsP5CS1 (MW030636) with the sequences of P5CS1 genes from other plants. *Arabidopsis thaliana* (AtP5CS1, NM\_129539), *Brassica napus* (BnP5CS1, AF314811), *Medicago sativa* (MsP5CS1, X98421), and *Medicago truncatula* (MtP5CS1, AJ278818). Identical nucleotides are marked by black asterisks.

|         |                                                                |      |
|---------|----------------------------------------------------------------|------|
| BnP5CS2 | aggacgaggtggtatgactgcaaaagttaaagctgctgttaatgcagcttatggtggcat   | 883  |
| AtP5CS2 | aggacgagggggtatgactgcaaaagttaaagctgctgttaatgcagcttatggtggcgt   | 1067 |
| PsP5CS2 | -----actgctaaggttaatgctgctgttgctgctgctaagtctagtat              | 44   |
| MtP5CS2 | gggcagagggggtatgactgctaaggttaatgctgctgtttgtgctgcttattcaggcac   | 830  |
|         | * * * * *                                                      |      |
| BnP5CS2 | tcctgttatcataaccagtggttatgcagctgagaatatagctaaagttcttaaaggact   | 943  |
| AtP5CS2 | tcctgttatcataaccagtggttatgcagctgagaatatagctaaagttcttaaaggact   | 1127 |
| PsP5CS2 | ccctgttattataattagtggctatgccacagacaacatcatacagagtgttcaagggga   | 104  |
| MtP5CS2 | acctgtgattatcaccagtggttatcctaatagacaacatcatgcgagtgttcaaggaga   | 890  |
|         | * * * * *                                                      |      |
| BnP5CS2 | gcgtgttggtacctgtttccaccaagatgcacatttgtgggctagagtcgtagatactac   | 1003 |
| AtP5CS2 | gcgtgttggtacctgtttccatcaagatgctcatttatgggctccggtcgtagatactac   | 1187 |
| PsP5CS2 | gaaaataggtacgtcttttcataaagatgcacatctgtggaagagcttaaggagagac     | 164  |
| MtP5CS2 | aagaattggtactgtattccataaggatgctcacttgtggaccagcataaaggaaataac   | 950  |
|         | * * * * *                                                      |      |
| BnP5CS2 | ttctcgtgacatggcagttgctgcaagggaagttctagaaagcttcaggcctttgtcttc   | 1063 |
| AtP5CS2 | ttctcgtgacatggcagttgctgcaagggaagctcaagaaagcttcaggcctttgtcttc   | 1247 |
| PsP5CS2 | tgacatgaaatggcagttgcagcacgtaatagtcttagacgtcttcaggccctaaaatc    | 224  |
| MtP5CS2 | tgacatgaaatggcagttgcagcacgacgacagctctaggaagcttcagattctaaatc    | 1010 |
|         | * * * * *                                                      |      |
| BnP5CS2 | agaagataggaaaaacattctactagatatagccaacgctctagaagcaaatgagaaaat   | 1123 |
| AtP5CS2 | agaagataggaaaacaaattctacacgacattgccaatgcccttgaaagtaaatgagaaaac | 1307 |
| PsP5CS2 | tgaagaaaggaggaagtattgtgcccgtggctgatgcattggagaaaaaccaaagtt      | 284  |
| MtP5CS2 | tgaacaaaggagaaaatattgttgagtggtgctgctatagagaaaaatgaaagtga       | 1070 |
|         | * * * * *                                                      |      |
| BnP5CS2 | aattaaggctgagaatgatttagatgttgctgcagcacaagaagctggatatgaagagtc   | 1183 |
| AtP5CS2 | aattaaagctgagaatgatttagatgttgctgcagcacaagaagctggatatgaagagtc   | 1367 |
| PsP5CS2 | gataaagttagagaatgaggctgatattgtgctgatgcgttggaagccggatatgacaagtc | 344  |
| MtP5CS2 | gatcaggcttgagaatgcttctgatgttgctgatgcagaggaggctggatatgagagatc   | 1130 |
|         | * * *                                                          |      |
| BnP5CS2 | tttggtagctcgttttagttatgaagcctggaaagatctcaagccttcgagcttctattcg  | 1243 |

|         |                                                                 |      |
|---------|-----------------------------------------------------------------|------|
| AtP5CS2 | tttggtagctcgcttagttatgaagcctgggaagatctcaagccttgagcttccgttcg     | 1427 |
| PsP5CS2 | tctgatatacagtttaaccctgaagcctgagaagatctctagtcttgcaaagctgtgcg     | 404  |
| MtP5CS2 | actgatatcgcgtttgacactgagacctgagaagattgctagtcttgtaaagctctgttcg   | 1190 |
|         | * * * * * * * * * * * * * * * * * * * * * * * *                 |      |
| BnP5CS2 | ccagctagctgaaatggaagacccaattggctcgtgttctaaagaaaactgaggttgaga    | 1303 |
| AtP5CS2 | ccagctagccgaaatggaagatccaataggccgtgtattaaagaaaactcaggttgaga     | 1487 |
| PsP5CS2 | cgtgctggcagatatggaagaaccaattggccaggttttgaagagaactgagctagctga    | 464  |
| MtP5CS2 | caagctggcagaaatggatgaacccattggctcagattttgaagagaactgagatagcaga   | 1250 |
|         | * * * * * * * * * * * * * * * * * * * * * * * *                 |      |
| BnP5CS2 | tggctcttatttttagagaaaacctcatcaccattaggtgttcttctgattgtttttgaatc  | 1363 |
| AtP5CS2 | tgatcttatttttagagaagacctcatcaccaataggtgttcttctgattgtttttgaatc   | 1547 |
| PsP5CS2 | tgacctcgtcttgagaaaaatatcatgttctcttgggtgtcctcttgattatatttgagtc   | 524  |
| MtP5CS2 | taaactcgttcttgagaaaaatatcatgtcccttgggtgtacttctagttatattcgagtc   | 1310 |
|         | * * * * * * * * * * * * * * * * * * * * * * * *                 |      |
| BnP5CS2 | ccgtcctgatgcacttgttcagatagcttcacttgcaatcaggagtggaatggctcttct    | 1423 |
| AtP5CS2 | ccggcctgatgcacttgttcagatagcttcgcttgcaatccggagtggaatggctcttct    | 1607 |
| PsP5CS2 | acgaccgatgctcttgttcagatagctgcattggcaattcgaagtggaaatggcttatt     | 584  |
| MtP5CS2 | tcgacctgatgctcttgttcagatagctgcattggcaattcgaagtggaaatggcttatt    | 1370 |
|         | * * * * * * * * * * * * * * * * * * * * * * * *                 |      |
| BnP5CS2 | gctgaaggggtgaaaagagggtcgtcgatcaaagtctatcttacacaaggtgatcactga    | 1483 |
| AtP5CS2 | gctgaaggggtgaaaagagggtcgtcgatcaaagtctatcttacacaaggtgatcactga    | 1667 |
| PsP5CS2 | acttaaaggaggaaggaagccgaagatcaaagtctatcttacacaagatcattacttc      | 644  |
| MtP5CS2 | gctcaaaggaggaaggaagccaaagatctaattgcagtcttacacaagattattacttc     | 1430 |
|         | * * * * * * * * * * * * * * * * * * * * * * * *                 |      |
| BnP5CS2 | tgcaattccgaagactggttgagggtaaactcataggacttgtgacttcgagagatgagat   | 1543 |
| AtP5CS2 | tgcaattccggagactggttgagggtaaactcataggacttgtgacctcaagagaggagat   | 1727 |
| PsP5CS2 | agccatgccagatacagtcggtagcaaacttatcgggcttgtcacttcaagagatgaaat    | 704  |
| MtP5CS2 | agctataccagatacagttggtggcaaacttatggccttgtgacttcaagggaagcaat     | 1490 |
|         | * * * * * * * * * * * * * * * * * * * * * * * *                 |      |
| BnP5CS2 | tcttgatttgcctcaagcttgatgatgttattgatcttgtgatcccaagaggcagcaacaa   | 1603 |
| AtP5CS2 | tcttgatttgcctcaagcttgatgacgttattgatcttgtgatcccaagaggcagcaacaa   | 1787 |
| PsP5CS2 | tccagatctactcaagcttgatgatgtgatagatcttgtgggtccctagaggcagtaataa   | 764  |
| MtP5CS2 | tctgatctactcaagcttgatgacgtgatagatcttgtgggtccctcgaggcagtaataa    | 1550 |
|         | * * * * * * * * * * * * * * * * * * * * * * * *                 |      |
| BnP5CS2 | gcttggttctcagataaaaaaactcaacgaaaatcccagtgctagggcatgaggatggtat   | 1663 |
| AtP5CS2 | gcttggttctcaaatataaaaaaactcgacgaaaatcccagtgctagggcatgaggatggaat | 1847 |
| PsP5CS2 | gctgggttctcaaatcaaggagtcaacaagaatccctgttcttgggtcatgctgatggaat   | 824  |
| MtP5CS2 | gcttggttctcaaatcaaggattctacaaagattcctgttctcggtcatgctgatggaat    | 1610 |
|         | * * * * * * * * * * * * * * * * * * * * * * * *                 |      |
| BnP5CS2 | ctgtcatgtgtatgttgacaagctcttgtaaagtagacatggcaaaacgtgttgtttcaga   | 1723 |
| AtP5CS2 | ctgtcatgtatatgttgataaagctcgtgtaaactggacatggcaaaagcgattgtttcga   | 1907 |
| PsP5CS2 | ttgtcatatctatgttgacaagctcgttaatatgtatggcaaaagcatatagttaggga     | 884  |
| MtP5CS2 | atgtcatgtatacattgacaaagcagctaatatcaatgtggcaaaagaagattgttaagga   | 1670 |
|         | * * * * * * * * * * * * * * * * * * * * * * * *                 |      |
| BnP5CS2 | tgcaaagtttagactatccagcagcctgtaacgctatggaaacccttcttgtacataagga   | 1783 |
| AtP5CS2 | tgcaaagtttgactatccagcagcctgtaatgcgatggaaacccttcttgtacataaaga    | 1967 |
| PsP5CS2 | tgcaaagactgattacccctgcagcttgcaatgcattggaaacccttcttgttcacaaaga   | 944  |
| MtP5CS2 | tgcaaagactgattatcctgcagcctgcaatgcaatggaaacccttcttgttcacaaaga    | 1730 |
|         | * * * * * * * * * * * * * * * * * * * * * * * *                 |      |
| BnP5CS2 | tctagagcagaatggtgtgctaaacgagcttatatatgcacctgcaagccaatggtgtcac   | 1843 |
| AtP5CS2 | tttgagcagaatggttttctcgatgatcttatttatgttctgcaaaccaaggcgtcac      | 2027 |
| PsP5CS2 | t-----                                                          | 945  |
| MtP5CS2 | tctagcaggaaatggtggactgaatgaacttgttgcgtaactccaaaaacaagggtgttca   | 1790 |
|         | *                                                               |      |

**Figure S2.** The alignment of the nucleotide sequence fragment of *Pisum sativum* PsP5CS2 (MW423825) with the sequences of P5CS2 genes from other plants. *Arabidopsis thaliana* (AtP5CS2, NM\_115419), *Brassica napus* (BsP5CS2, AF314812), *Medicago truncatula* (MtP5CS2, JN809240). Identical nucleotides are marked by black asterisks.

|        |                                                                |      |
|--------|----------------------------------------------------------------|------|
| AtPDH1 | agctcatggaaggattcaagaaatctgtaggaaatgccaagagtcgaatgtaccattggt   | 1181 |
| NtPDH2 | agctcacaaaagacttacgaaaatttgcgagaaatgcttggaacacgagcttcctttact   | 890  |
| MsPDH2 | tgctaacaagagattccttgagctttgtcgagaaatgtgtgcaagccaatattccattatt  | 1511 |
| MsPDH1 | tgctaacaagagattccttgagctttgtcgagaaatgtgtgcaagccaatattccattatt  | 926  |
| PsPDH1 | -----ttatt                                                     | 5    |
| MtPDH1 | agcaaaccaagattacaacaactttgtaaaaatgtgttgaagcaaacatgccaatatt     | 963  |
|        | * *                                                            |      |
| AtPDH1 | gattgatgcggaagacacaatcctccaaccgcgatcgattacatggcttattcatcggc    | 1241 |
| NtPDH2 | cattgatgccgaggatacaactattcaacctggaattgattacatggcttattctgcagc   | 950  |
| MsPDH2 | ggttgatgctgaacatacttcagttcaacctgctattgattactttacttactcttctgc   | 1571 |
| MsPDH1 | ggttgatgctgaacatacttcagttcaacctgctattgattactttacttactcttctgc   | 986  |
| PsPDH1 | ggttgatgctgaacacactactgttcaaccggctatcgattacttcacgtattcttctgc   | 65   |
| MtPDH1 | ggttgatgctgaacacactactgttcaaccagctattgattacttcacatactcttcagc   | 1023 |
|        | ***** * * * * * * * * * * * * * * * *                          |      |
| AtPDH1 | gatcatgttcaatgctgacaaagaccgaccaatcgtttacaacacgattcaggcgtactt   | 1301 |
| NtPDH2 | aattaagtaccacaaagacg---atggcccttttgattttcggaacaattcaagcttactt  | 1007 |
| MsPDH2 | tattatgcataacaaaggtg---aaaaccctattgtgtttggaaccattcagacttattt   | 1628 |
| MsPDH1 | tattatgcataacaaaggtg---aaaaccctattgtgtttggaaccctcagacttattt    | 1043 |
| PsPDH1 | gattgttcataacaaagatg---ataatcctattgtgtttggaacaattcaaacttactt   | 122  |
| MtPDH1 | aattatgcataataaagatg---ataatcctattgtgtttggaacaattcaaacttattt   | 1080 |
|        | * * * * *                                                      |      |
| AtPDH1 | gagagacgccggtgagagactgcatttggcagtacaaaatgctgagaaagagaatgttcc   | 1361 |
| NtPDH2 | gaaagacgcgaaagaaagaatggcgatagcgaaaaagctgcagagaaaatgggagttcc    | 1067 |
| MsPDH2 | gaaagatgctaaggagagaaatgttgttggcatcaaaggctgctgagaaaatggggatacc  | 1688 |
| MsPDH1 | gaaagatgctaaggagagaaatgttgttggcatcaaaggctgctgagaaaatggggatacc  | 1103 |
| PsPDH1 | gaaagattctaagagagattgtttcttgcgacacaaagctgctgataaaagtggatttcc   | 182  |
| MtPDH1 | gaaagatgctaaggagagattgtttcttgcacaaaagctgctgaaaaaattggaattcc    | 1140 |
|        | ** *** * * * * * * * * * * * * * * *                           |      |
| AtPDH1 | tatgggggttcaagttggtgagaggggcttacatgtctagcgaagctagcttggcggattc  | 1421 |
| NtPDH2 | aatgggattttaagttggtgaggggtgcttatatgtgtagtgagagagattggcttctcg   | 1127 |
| MsPDH2 | aatgggggtttaaagttggttagaggtgcttatatgtctagtgaagaaaattggctgctga  | 1748 |
| MsPDH1 | aatgggattttaagttggttagaggtgcttatatgtctagtgaagaaaattggctgctga   | 1163 |
| PsPDH1 | aatgggattttaagttggttagaggtgcttatatgtctatggaaagtaaaatagctgaatc  | 242  |
| MtPDH1 | tatgggattttaaattggttagaggtgcttatatgtcaacagaaagtacattggctgaatc  | 1200 |
|        | ***** * * * * * * * * * * * * * * *                            |      |
| AtPDH1 | cctggggttgcaagtcgccagtc-cacgacacaattcaggatactcactcttgtttacaatg | 1480 |
| NtPDH2 | attaggattccaatctccaatt-catgatgcattgaacaaacacatgcttgccttcaatt   | 1186 |
| MsPDH2 | tttgggttatgcttctccaatt-cataacactattaaggatacacataagtgtttcaatg   | 1808 |
| MsPDH1 | tttgggttatgcttctccaatt-cataacactattaaggatacacataagtgtttcaatg   | 1222 |
| PsPDH1 | tttcggatatggatcgccgatt-catgatactattcaagatacacatagtaacttcaatg   | 301  |
| MtPDH1 | tttgggttctaagtcaccaatt-catgatactattaagatacacataattgcttcaatg    | 1259 |
|        | * * * * * * * * * * * * * * * *                                |      |
| AtPDH1 | attgtatgacattcctgatggagaaagcatcaaacggttctggtttcggtgctgcttctcg  | 1540 |
| NtPDH2 | cttgcgctgagtttatgattgaagagattgctaattggctctggagcggttggt---cttg  | 1243 |
| MsPDH2 | attgttcaaattatatgcttgagaagattgctaattggctctggtggagttggt---cttg  | 1865 |
| MsPDH1 | attgttcaaattacatgcttgagaagattgctaattggctctggtggagttggt---cttg  | 1279 |
| PsPDH1 | attgttcgtctttttgcttgagaaggttgcaaatggacgtggttctgtcgtc---cttg    | 358  |
| MtPDH1 | attgttcatcttattttgcttgagaagtttgctaattggaaaaggatctgttggt---cttg | 1316 |
|        | *** * * * * * * * * * * * * * * *                              |      |
| AtPDH1 | caacacataacgctgatcc-----                                       | 1559 |
| NtPDH2 | ctactcataacattgagtcaggaaaacttgctgca-----                       | 1278 |
| MsPDH2 | caactcataacattgaatcagggtatatatttatgatgatataatgatttatatttat     | 1925 |
| MsPDH1 | caactcataacattgaatc-----                                       | 1298 |
| PsPDH1 | ctacacataatattgaatc-----                                       | 377  |
| MtPDH1 | ctacacacaacattgaatc-----                                       | 1335 |
|        | * * * * * * * * * *                                            |      |

**Figure S3.** The alignment of the nucleotide sequence fragment of *PsPDH1* (MW183670) with the sequences of stress-downregulated *PDH* genes from other plants. *Arabidopsis thaliana* (*AtPDH1*, NM\_001339059), *Medicago sativa* (*MsPDH1*, AY556386; *MsPDH2*, AY615900), *Medicago truncatula* (*MtPDH1*; XM\_013595747), and *Nicotiana tabacum* (*NtPDH2*, AY639146). The identical nucleotides are marked by black asterisks.

| Species | Sequence                                                                                                                | Position |
|---------|-------------------------------------------------------------------------------------------------------------------------|----------|
| GmProT1 | cacattaggtatagagatcttgcgtgatttatatacaggtaagaagcggtataatctcaca                                                           | 511      |
| PsProT1 | -----aaaaaggcatataaaactcaca                                                                                             | 21       |
| MtProT1 | cacattagatacagagatcttgcgtgatatatacaggcaaaaaggcatattctatcact                                                             | 547      |
| AtProT2 | cacattcggtacagagatcttgcaggcttcacatcggtaaaaagatgtatcgtgttaca                                                             | 490      |
| AtProT1 | catattcgctatagagaccttgcgtgattcatttacggtaggaaggcttatcatcttaca                                                            | 387      |
| AtProT3 | cacattcgctatagagaccttgcgggattcatttacggtagaaggcttattgtcttaca<br>* ** *** * **                                            | 836      |
| GmProT1 | tgggttctgcagtatatcaatcttttcatgataaatactggctacatcattttggccggt                                                            | 571      |
| PsProT1 | tgggctcttcagtatatcaatctttttatgataaatactggcttcattattctggtcgt                                                             | 81       |
| MtProT1 | tggactctgcagtatatcaatcttttcatgataaatactggttacatcattttagctggt                                                            | 607      |
| AtProT2 | tggggattgcaatatgtcaatcttttcatgattaattgtggcttcatactattgctggt                                                             | 550      |
| AtProT1 | tggggattgcaatatgttaatcttttcatgattaattgtggattcattatcctagctggt                                                            | 447      |
| AtProT3 | tgggtgttgcaatatgtcaatcttttcatgattaattgtggtttcatcatactagctggt<br>*** * ** *** * ***** ***** *** * ** * ** *              | 896      |
| GmProT1 | tcagccttgaaagctacttatgttctattcagggatgatgggctgctgaaacttccatat                                                            | 631      |
| PsProT1 | tcagccttaaaagctactttataccttggttagggatgatgctcagctgaagcttccatat                                                           | 141      |
| MtProT1 | tcagccttgaaggctgctttataccgtggttcgagatgatgggtgatacgaagcttcgcat                                                           | 667      |
| AtProT2 | tcggccttaaaaggctgtttatgtactttttagagatgatgctcatgaaactgctcac                                                              | 610      |
| AtProT1 | tcgccttaaaaggctgtttatgtgcttttcagggatgatcataccatgaaactacctcat                                                            | 507      |
| AtProT3 | tcgccttaaaaggctgtttatgtgctttttagggatgatcatgccatgaagttacctcat<br>** ***** ** *** ***** * ** * ***** ***** * ** *         | 956      |
| GmProT1 | tgtattgccataggtggatttgtgtgcaatgtttgccatctgcattcctcatcttttca                                                             | 691      |
| PsProT1 | tgtatagttatagctgggttttgtgtgcaatgtttgccatttgtattcctcatcttttca                                                            | 201      |
| MtProT1 | tgtattgctatagctggaattgtgtgcaatgtttgccatttgcattcctcatcttttca                                                             | 727      |
| AtProT2 | ttcatcgccatcgcggtgttgtatgcgcgattttcgcaatcggtattcctcatttatca                                                             | 670      |
| AtProT1 | tttatagccattgctgggttggatttgtgcaatgtttcgctattgggattcctcatttatcg                                                          | 567      |
| AtProT3 | tttatagctattgcgggtctgatttgtgcggtttttgctattggaattcctcatttgtcg<br>* ** * ** * ** * ** * ** * ** * ** * ** * ***** * **    | 1016     |
| GmProT1 | gctctgggaatttggctaggttttcaacagctcttcagcctggcatatattgttatatca                                                            | 751      |
| PsProT1 | gctcttggaatttgggtggcagtttcaaccgctcttcggcttggatatacatttccgtagca                                                          | 261      |
| MtProT1 | gctcttggaatttgggtgggagtttcaacagctcttcacctttgtttacattgtcatagca                                                           | 787      |
| AtProT2 | gctcttggaattcggctaggtttcaacaatcctcagcataatctacattattgttgca                                                              | 730      |
| AtProT1 | gctcttggggtctggcttggagtttcgaccttccctcagctctcatctatattgttggga                                                            | 627      |
| AtProT3 | gctcttgggatatggcttgcggtttcgactatcctcagcctcatctatctggttgga<br>***** ** * ** * * ***** ** * ** * ***** * **               | 1076     |
| GmProT1 | tttgtgttgcgtctaaagatggattacaatcaccgcctcgagattacgagattccagga                                                             | 811      |
| PsProT1 | tctgttctatcaattaaagatggaatacattcaccgcctcgagattacaccattccagga                                                            | 321      |
| MtProT1 | ttggtgctatcaattaaagatggaatgaattcactgctcgagattacgctgttcagaa                                                              | 847      |
| AtProT2 | atagttctatcagctaaagatggagtaaaacaagcctgaaagagattacaacatacaagga                                                           | 790      |
| AtProT1 | atcgtgctatcggttagagatggagtaaaaaacacctcaagagattacgagatacaagga                                                            | 687      |
| AtProT3 | atcgtgctatcggttaaagatggagttaaagcacttcaagagattacgagatacaagga<br>** * ** ** ***** * * ** ***** * * ** *                   | 1136     |
| GmProT1 | gatggtgtaagcaaaatctttacaataattggagcatctgctaacccttgtgtttgcattt                                                           | 871      |
| PsProT1 | gaaggggcaagtaaagtatttgaaacgattggggcgtctgctaaccctagtgttcgcatat                                                           | 381      |
| MtProT1 | catggtgtaactaaaaattttcacacaatttggggcgtctgctagtctagtgtttcgcatat                                                          | 907      |
| AtProT2 | tcataataaacaactcttttaccataacaggagcagctgcaaatctagtgttttcgatttc                                                           | 850      |
| AtProT1 | tcattcattgacaaactttttaccatcacaggagcagcgcaaatctggttttcgcatct                                                             | 747      |
| AtProT3 | tcaccactaagcaaaactttttaccatcactggagcagcgctacactagtgttttcgtattc<br>* *** * ** * * ** * ** * ** * ** * ** *               | 1196     |
| GmProT1 | aataccggcatgcttccctgagatacaggcaacaattaggcaaccagttgttaagaacatg                                                           | 931      |
| PsProT1 | aacaccggcatgcttcccgagattcaggcaacaattaggcagccagttgtcaagaacatg                                                            | 441      |
| MtProT1 | aataccggcatgcttccctgagatacaggccacaattaggcaaccagttgtcaagaacatg                                                           | 967      |
| AtProT2 | aacacgggaatgcttcccgaaatacaggccacggtgaagcaaccggtcggttaaaaacatg                                                           | 910      |
| AtProT1 | aacacggggatgcttccagaaattcaggcaacagtgaggcaaccagttgttaaaaacatg                                                            | 807      |
| AtProT3 | aacacagggatgcttccagaaattcaggcaacagtaaaagcaaccagtagtaaaaaacatg<br>** ** * ** ***** ** * ** ***** * * ** * ** * ** * ** * | 1256     |
| GmProT1 | atgaaagccttgctacttttcagtttacggttggagttctaccattgtacctggttgctttt                                                          | 991      |
| PsProT1 | atgaaatccctttattttcagtttacagtcggagttataccattgtaccttataacctttt                                                           | 501      |
| MtProT1 | atgaaatccctgtgggttttcagtttaccattggacttgtaccaatgtacatggttacctttt                                                         | 1027     |
| AtProT2 | atgaaggctctgtattttcaattcactgttgggtgttttacctatgtacgcggttacattc                                                           | 970      |
| AtProT1 | atgaaggctctatactttcaattcacagcggtgttttaccgatgtacgcagttacattc                                                             | 867      |
| AtProT3 | atgaaggctctatactttcaattcacgggtgggtgttttaccgatgtttgcggtgttattc<br>***** * * * ***** ** * ** ***** **** * ** * ** *       | 1316     |

|         |                                                                             |      |
|---------|-----------------------------------------------------------------------------|------|
| GmProT1 | acaggatactgggcttatggatcttccacagaagtgtatttgctgaatagtgtgaatggt                | 1051 |
| PsProT1 | tcaggataattgggcttatggatcttccacagaaacctattttactgaatagtgtcaacggt              | 561  |
| MtProT1 | gcaggatactgggcttatggaaataagacagaaacctatttgctgaatagtgtgaacggt                | 108  |
| AtProT2 | atcggatattgggcttacgggtcctcgacatcgacttatctcttaaacagcgctcagtgga               | 1030 |
| AtProT1 | atcggatattgggcttacggatcctcaacctcgacctatactactaaacagtggttaatggc              | 927  |
| AtProT3 | atcgggtattgggcttacggatcctcgacctcgccctatctactaaacaagttaatggt                 | 1376 |
|         | ** ** *              **                    *** * * ** * ** * **             |      |
|         |                                                                             |      |
| GmProT1 | ccagtttgggtgaaggcttctgccaacatcacagccttttcttcaatcagtcattgcattg               | 1111 |
| PsProT1 | ccggtctgggtgaaggcttttcgccaatatatttcagccttccttcaatcagtcattgc----             | 617  |
| MtProT1 | ccagcttgggtgaaagcttttgccaatatattacagccttccttcaatcagtcattgcatta              | 1147 |
| AtProT2 | cctgtttgggtcaaagcactcgctaacatttccagcttttctccaatctgttatctcttta               | 1090 |
| AtProT1 | ccactctgggtcaaagcccttgctaacgtctctgctatccttcaatctgttatctctttg                | 987  |
| AtProT3 | ccacttgggttaaagcccttgctaacatctccgctatccttcaatccggttatctcgttg                | 1436 |
|         | **              ***** ** **              ** ** *              ***** ** ** * |      |

**Figure S4.** The alignment of the nucleotide sequence fragment of *PsProT2* (MW030635) with the sequences of *ProT* genes from other plants. *Arabidopsis thaliana* (*AtProT1*, X95737; *AtProT2*, X95738; *AtProT3*, NM\_129215), *Glycine max* (*GmProT1*, XM\_003552545), and *Medicago truncatula* (*MtProT1*, XM\_003600790). Identical nucleotides are marked by black asterisks.



|         |                                                                 |      |
|---------|-----------------------------------------------------------------|------|
| GmProT2 | agggaaacacattcgttgctgcagcatttccttttatgggtgactttgtaaactttcttgg   | 1231 |
| PsProT2 | aggaacacattcatcgcgccgcatttccttttatgggtgactttgtaaacttgtagg       | 304  |
| MtProT2 | tgggaatacattcatttgctgcagcatttccttttatgggtgactttgtaaacttgtagg    | 1417 |
| AtProT2 | ggtgagcactcttctctctgcgcttttacggtttctcgagatttcatgagccttaccgg     | 1266 |
| AtProT1 | ggtaagcacgcttatctcagcgctgctgcccgttcctcggtgacttcatgagcctaactgg   | 1163 |
| AtProT3 | agttagtacgcttctctcagcactcttgccgttccttggggacttcatgagcctcactgg    | 1612 |
|         | * * ** * * * ** * ** * * * * * * *                              |      |
| GmProT2 | ctcattttcactcggttcctctgaccttcatgttccccagcatggtcttcatcaaggtaa    | 1291 |
| PsProT2 | ctcattttcacttggttcccctaacattcatgttccccagcatgatTTTTCTTAAGGTA     | 364  |
| MtProT2 | ctcattttcactagttcctcttaccttcatgttccccagcatgatcttcttaagataaa     | 1477 |
| AtProT2 | agcgataagcacggttccctctcacattcatattagcgaatcacatgtatcttgttgctat   | 1326 |
| AtProT1 | tgcagtgagcacattccctctcacattcattctagccaaccatatgtactataaggcaaa    | 1223 |
| AtProT3 | tgcagtgagcacattcccccttacattcattctagccaaccacatgtactataaggctaa    | 1672 |
|         | * * * ** * * * * * * * * *                                      |      |
| GmProT2 | gggaagaacagctagaatagagaagaaggcgtggcactgggttcaacatcggttttttcttt  | 1351 |
| PsProT2 | gggaagacagctagaacagagaagaaggcatggcattggatcaacattatattttcatt     | 424  |
| MtProT2 | gggaaaaactgctagaacagagaagaagggtgtggcattggatcaacattgtcgtttcatt   | 1537 |
| AtProT2 | gaatgatgagcttagtcttgtgcaaaagctatggcattggctcaatgtttgcttctttgg    | 1386 |
| AtProT1 | gaacaataagctgaatgctatgcaaaagctatggcattggcttaacgttgtcttcttttag   | 1283 |
| AtProT3 | gaacaataagctcaataacttttgcaaaagctatgccattggctcaacgttgtcttctttcag | 1732 |
|         | * * * * * * * * * * * *                                         |      |
| GmProT2 | tctgctcacaaatagcaaccacaatttcagcaattcggttgatagtcaacaacatccaaaa   | 1411 |
| PsProT2 | tctacttacaatagcaaccacaatttcagctcttcg-----                       | 460  |
| MtProT2 | tctacttacaatagcaaccacaatttcagctcttcggttcataatcaacaacgttcaaaa    | 1597 |
| AtProT2 | attaatgtctcttctgctgctgctattgctgctgttagactcatctctgttgactccaagaa  | 1446 |
| AtProT1 | tttgatgtctgttgctgcagccattgcagctgtcagactcatcgccgttgattccaaaaa    | 1343 |
| AtProT3 | tttgatgtctgttgctgcgcccattgcagctcttaggctcatcgcccttgactccaaaaa    | 1792 |
|         | * * * * * * * * * * * *                                         |      |

**Figure S5.** The alignment of the nucleotide sequence fragment of *PsProT2* (MW030635) with the sequences *ProT* genes from other plants. *Arabidopsis thaliana* (*AtProT1*, X95737; *AtProT2*, X95738; *AtProT3*, NM\_129215), *Glycine max* (*GmProT2*, XM\_014775460), and *Medicago truncatula* (*MtProT2*, XM\_013602264). Identical nucleotides are marked by black asterisks.

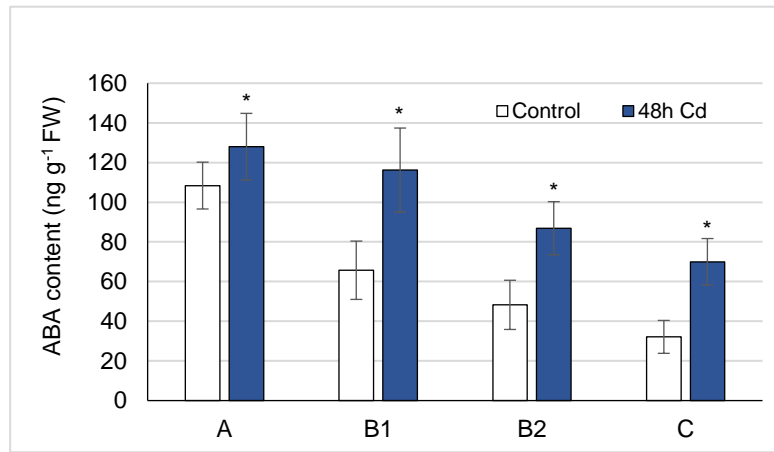

**Figure S6.** Changes in the abscisic acid (ABA) content after 48 hours of Cd treatment. Cadmium was applied as 50  $\mu\text{M}$   $\text{CdCl}_2$ . A, the youngest unexpanded leaves; B1, the youngest fully expanded leaves; B2, fully expanded mature leaves; C, the oldest true leaves. The results are the means ( $\pm\text{SD}$ ) of three biological replicates. Asterisks indicate statistically significant differences between control and Cd-treatment ( $P < 0.05$ ).

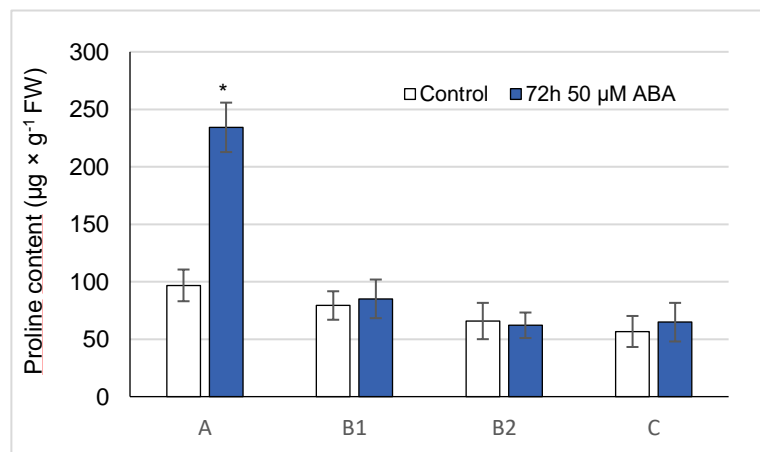

**Figure S7.** Changes in the proline content after 72 hours of abscisic acid (ABA) treatment. ABA was applied at concentrations of 50  $\mu\text{M}$ . A, the youngest unexpanded leaves; B1, the youngest fully expanded leaves; B2, fully expanded mature leaves; C, the oldest true leaves. The results are the means ( $\pm\text{SD}$ ) of three biological replicates. Asterisks indicate statistically significant differences between control and ABA-treatment ( $P < 0.05$ ).

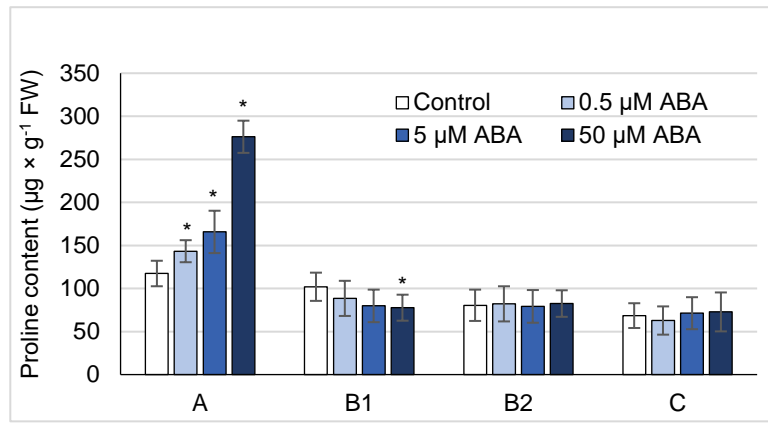

**Figure S8.** Changes in the proline content after 24 hours of abscisic acid (ABA) treatment. ABA was applied at concentrations of 0.5, 5, and 50 µM. A, the youngest unexpanded leaves; B1, the youngest fully expanded leaves; B2, fully expanded mature leaves; C, the oldest true leaves. The results are the means (±SD) of three biological replicates. Asterisks indicate statistically significant differences between control and ABA-treatment ( $P < 0.05$ ).

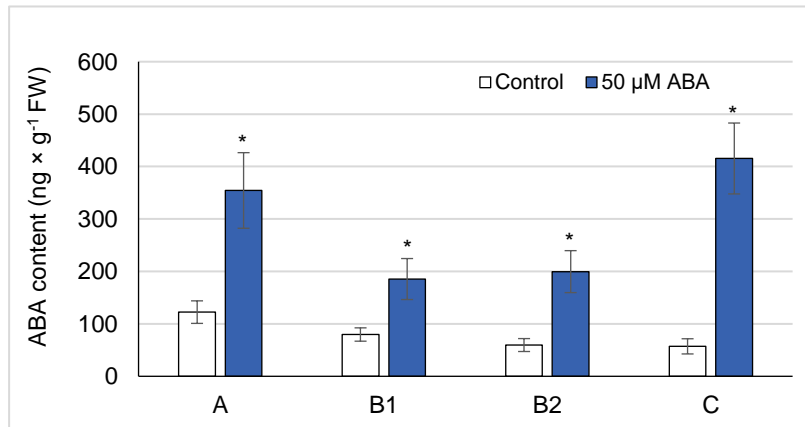

**Figure S9.** Changes in the abscisic acid content after 24 hours of abscisic acid (ABA) treatment. ABA was applied at concentrations of 0.5, 5, and 50 µM. A, the youngest unexpanded leaves; B1, the youngest fully expanded leaves; B2, fully expanded mature leaves; C, the oldest true leaves. The results are the means (±SD) of three biological replicates. Asterisks indicate statistically significant differences between control and ABA-treatment ( $P < 0.05$ ).
